# Supplementary material
Source: publisher site journal article supplement (https://www.spandidos-publications.com/6995/downloadSupplementary)
Supplement: Supplementary file 1 [file downloadSupplementary]

## Sheet: Table SII
Table SII. The QC of the DNA library and NGS data for the panel-sequenced samples. QC, quality control; NGS, next-generation sequencing.
Sample no.	Input DNA, ng	Library concentration, ng/µl	Raw									After QC										Reference Alignment
			total_reads	total_bases	q20_bases	q30_bases	q20_rate	q30_rate	read1_mean_length	read2_mean_length	gc_content	total_reads	total_bases	q20_bases	q30_bases	q20_rate	q30_rate	read1_mean_length	read2_mean_length	gc_content	insert_size_peak	mapped_reads	mapping_ratio	mapped_reads_on_amplicon	mapped_reads_on_amplicon_ratio	mean_depth	mean*0.2
18N	20	89.8	2432314	364847100	355600404	345637654	0.974656	0.947349	150	150	0.525572	2351574	352495790	347091973	338922678	0.98467	0.961494	149	149	0.526742	197	2334482	0.992732	2273879	0.97404	39132.7	0.92
18P	20	84.2	2416456	362468400	352900793	343084574	0.973604	0.946523	150	150	0.518974	2331532	349366292	343966029	336126188	0.984543	0.962103	149	149	0.520418	192	2309310	0.990469	2272801	0.984191	38849.9	0.88
19N	20	61.2	2510386	376557900	368177512	359147924	0.977745	0.953765	150	150	0.524072	2436606	365030858	360263546	352858176	0.98694	0.966653	149	149	0.525457	197	2422586	0.994246	2288959	0.944841	39347.9	0.92
19P	20	42.6	2315488	347323200	330241339	316718685	0.950819	0.911885	150	150	0.517429	2101536	314872502	308688578	300553762	0.980361	0.954525	149	149	0.522287	197	2072650	0.986255	1983801	0.957133	38296.1	0.92
20N	20	60.8	2578298	386744700	374395431	363096978	0.968069	0.938854	150	150	0.523662	2443622	366162138	360641260	352637947	0.984922	0.963065	149	149	0.526383	192	2419256	0.990029	2317062	0.957758	39423	0.88
20P	20	47.6	2216972	332545800	324482645	315606087	0.975753	0.949061	150	150	0.519575	2153506	322694998	317619392	310133608	0.984271	0.961073	149	149	0.520921	197	2119087	0.984017	2097320	0.989728	39131.2	0.92
2100755-1	20	58	2363394	354509100	343859820	331854115	0.96996	0.936095	150	150	0.523296	2271910	340277752	333262795	323326377	0.979385	0.950184	149	149	0.525078	181	2253132	0.991735	2222080	0.986218	36834	0.92
2100755-11-P	20	76.4	2542504	381375600	372449975	361867172	0.976596	0.948847	150	150	0.531839	2466446	369738772	363698987	354650599	0.983665	0.959192	149	149	0.533075	197	2454053	0.994975	2440792	0.994596	37801.9	0.92
2101402-10	20	48.4	1952090	292813500	285288992	276461705	0.974303	0.944156	150	150	0.526167	1891660	283389016	278158814	270590752	0.981544	0.954839	149	149	0.527484	197	1873007	0.990139	1848553	0.986944	35440.8	0.92
2101402-16-P	20	77.8	2167944	325191600	317986779	309348438	0.977844	0.951281	150	150	0.531443	2107124	315808330	310859375	303408077	0.984329	0.960735	149	149	0.5326	197	2093570	0.993568	2078694	0.992894	36540.7	0.92
2101570-1-P	20	37	2528360	379254000	370988196	360713873	0.978205	0.951114	150	150	0.532673	2461898	369161494	363307326	354319309	0.984142	0.959795	149	149	0.533682	197	2453949	0.996771	2446457	0.996947	36744.1	0.92
2101570-6	20	83	2304926	345738900	337240129	327042900	0.975419	0.945925	150	150	0.530949	2233536	334824862	328981623	320257172	0.982548	0.956492	149	149	0.532111	197	2216734	0.992477	2203398	0.993984	36211.3	0.92
2101576-4-P	20	63.2	2568204	385230600	377457802	367556942	0.979823	0.954122	150	150	0.535881	2506976	375916322	370323814	361569257	0.985123	0.961834	149	149	0.536788	197	2495941	0.995598	2488782	0.997132	37232.5	0.92
2101576-5	20	50.4	2756918	413537700	405102698	394539801	0.979603	0.95406	150	150	0.53426	2689418	403180134	397140645	387855628	0.98502	0.961991	149	149	0.535204	197	2678014	0.99576	2661933	0.993995	38845.1	0.92
2101676-8	20	97	2556698	383504700	373270350	361656959	0.973314	0.943031	150	150	0.529748	2467984	369911140	363120027	353397946	0.981641	0.955359	149	149	0.531251	197	2453556	0.994154	2437309	0.993378	37496.2	0.92
2101676-9-P	20	35.8	2729346	409401900	400428698	389170049	0.978082	0.950582	150	150	0.535065	2656448	398278270	391916256	382077817	0.984026	0.959324	149	149	0.536011	197	2642760	0.994847	2631243	0.995642	37130.3	0.88
2101821-15-P	20	97.6	2941696	441254400	431732698	420081608	0.978421	0.952017	150	150	0.535592	2863712	429378218	422689351	412543311	0.984422	0.960792	149	149	0.536656	197	2851833	0.995852	2843413	0.997048	38153.2	0.92
2101821-2	20	91.6	2925614	438842100	428522312	415800479	0.976484	0.947495	150	150	0.531547	2843036	426194760	418876206	407846298	0.982828	0.956948	149	149	0.532668	192	2829010	0.995067	2817538	0.995945	38823	0.92
2103200-15-P	20	21.6	2624272	393640800	385559157	375596553	0.979469	0.954161	150	150	0.53412	2556866	383421494	377747156	369072438	0.985201	0.962576	149	149	0.535153	197	2548624	0.996777	2542657	0.997659	36136.5	0.92
2103200-2	20	22.6	3040026	456003900	445700586	432944761	0.977405	0.949432	150	150	0.530716	2959160	443690882	436291567	425156333	0.983323	0.958226	149	149	0.531756	192	2942809	0.994474	2935107	0.997383	36820.8	0.92
2103224-2	20	40.2	2361272	354190800	345227921	334717942	0.974695	0.945022	150	150	0.527091	2285244	342515554	336460911	327528947	0.982323	0.956245	149	149	0.528396	197	2268543	0.992692	2250269	0.991945	35705.1	0.92
2103224-9-P	20	74.2	2464908	369736200	361731222	351365961	0.978349	0.950315	150	150	0.533894	2401232	360110492	354404903	345343964	0.984156	0.958994	149	149	0.534853	197	2393994	0.996986	2391431	0.998929	34325.8	0.84
2104410-16-P	20	7.42	2418204	362730600	353476153	342497207	0.974487	0.944219	150	150	0.522612	2345212	351506450	344957949	335544265	0.98137	0.954589	149	149	0.523954	192	2332194	0.994449	2318907	0.994303	34600.2	0.88
2104410-2	20	8.14	1963348	294502200	286049654	276308186	0.971299	0.938221	150	150	0.51941	1897400	284222406	278284801	270009891	0.979109	0.949995	149	149	0.521078	192	1881851	0.991805	1862414	0.989671	34491.5	0.88
2104957-20-P	20	39.4	2840258	426038700	416402468	404342202	0.977382	0.949074	150	150	0.534001	2764598	414567936	407646840	397075233	0.983305	0.957805	149	149	0.535045	192	2758248	0.997703	2751509	0.997557	38244.1	0.92
2104957-8	20	25.6	2224642	333696300	327808414	320071015	0.982356	0.959169	150	150	0.53286	2179682	326868672	322579731	315634993	0.986879	0.965632	149	149	0.533571	192	2174937	0.997823	2170559	0.997987	34699.3	0.88
2105386-15	20	28.8	1652488	247873200	245432577	241138230	0.990154	0.972829	150	150	0.52505	1650826	247435008	245025220	240767355	0.990261	0.973053	149	149	0.525101	197	1589349	0.96276	1570310	0.988021	35128.3	0.92
2105386-21-P	20	73.4	2191692	328753800	325064927	318789716	0.988779	0.969691	150	150	0.525698	2189008	328176772	324538081	318320116	0.988912	0.969965	149	149	0.525777	197	2059575	0.940871	2039762	0.99038	37594.1	0.92
2105694-2	20	17	2406726	361008900	357228166	350655659	0.989527	0.971321	150	150	0.527669	2404036	360311818	356581626	350067660	0.989647	0.971569	149	149	0.52774	197	2307053	0.959658	2282951	0.989553	39028.6	0.96
2105694-9-P	20	40.2	2584602	387690300	384139399	377831107	0.990841	0.974569	150	150	0.532918	2582126	387089074	383583546	377326756	0.990944	0.97478	149	149	0.532961	197	2547676	0.986658	2530873	0.993405	38911.9	0.92
2106351-10-P	20	36.6	2825464	423819600	415431984	404717985	0.980209	0.95493	150	150	0.53563	2758722	413637444	407578851	398066069	0.985353	0.962355	149	149	0.536433	197	2745475	0.995198	2736942	0.996892	37402.5	0.92
2106351-2	20	89.4	2221596	333239400	325134401	315642262	0.975678	0.947194	150	150	0.528916	2152612	322594556	317118578	309035338	0.983025	0.957968	149	149	0.530209	197	2132310	0.990569	2116671	0.992666	36196.3	0.92
2106614-1	20	91.4	2540502	381075300	377927596	372194264	0.99174	0.976695	150	150	0.533299	2538262	380570682	377462967	371775474	0.991834	0.976889	149	149	0.533344	197	2495798	0.98327	2484735	0.995567	38258.9	0.92
2106614-12-P	20	74.4	2766810	415021500	411502067	405045043	0.99152	0.975962	150	150	0.535079	2764864	414621808	411138860	404726462	0.9916	0.976134	149	149	0.535122	197	2748354	0.994029	2741232	0.997409	38537.1	0.92
2107379-13-P	20	118	2742662	411399300	401690285	390043521	0.9764	0.94809	150	150	0.530132	2662128	399070410	392362585	382330097	0.983191	0.958052	149	149	0.531342	197	2646004	0.993943	2628807	0.993501	37620.9	0.92
2107379-7	20	106	2116840	317526000	310523194	301840027	0.977946	0.950599	150	150	0.531873	2061774	309000534	303989580	296349355	0.983783	0.959058	149	149	0.532834	192	2047750	0.993198	2031595	0.992111	36009.1	0.92
2107616-3	20	39.6	2866054	429908100	419255019	406793786	0.97522	0.946234	150	150	0.525525	2776274	416207976	408947648	398385134	0.982556	0.957178	149	149	0.526947	192	2761209	0.994574	2751394	0.996445	36250.7	0.92
2107616-6-P	20	43.6	2400550	360082500	352273135	342407989	0.978312	0.950915	150	150	0.532831	2338158	350667068	345067043	336424831	0.98403	0.959385	149	149	0.533828	197	2333627	0.998062	2329724	0.998327	35439.1	0.92
2108147-16-P	20	50	2699874	404981100	394892291	382969364	0.975088	0.945647	150	150	0.533435	2613718	391966100	385144453	375015893	0.982596	0.956756	149	149	0.534876	197	2607730	0.997709	2602453	0.997976	37160.5	0.92
2108147-2	20	42.8	2073432	311014800	302310305	292504536	0.972013	0.940484	150	150	0.513511	2002200	300182928	294204932	285941510	0.980085	0.952558	149	149	0.515259	181	1995077	0.996442	1986607	0.995755	34371.6	0.88
2109122-5	20	49.2	2685218	402782700	393164534	381527904	0.976121	0.94723	150	150	0.529779	2608610	391133674	384335856	374274224	0.98262	0.956896	149	149	0.531054	192	2598060	0.995956	2590476	0.997081	38249.2	0.92
2109122-6-P	20	61.2	2965146	444771900	435657721	424179171	0.979508	0.9537	150	150	0.534589	2893942	433958302	427337566	417192907	0.984743	0.961366	149	149	0.535502	197	2885143	0.99696	2878652	0.99775	37431.7	0.92
2109254-18-P	20	112	2439620	365943000	357584151	347734396	0.977158	0.950242	150	150	0.531205	2367118	354814896	349197779	340777034	0.984169	0.960436	149	149	0.53248	197	2352812	0.993956	2339189	0.99421	37122.9	0.92
2109254-8	20	102	2585580	387837000	378870322	368090258	0.97688	0.949085	150	150	0.526737	2511508	376328726	370169150	360863493	0.983632	0.958905	149	149	0.527921	192	2491946	0.992211	2471224	0.991684	37695.3	0.92
2112455-4	20	59	2300338	345050700	335550554	324233792	0.972467	0.93967	150	150	0.52141	2225470	333460074	326769566	317065053	0.979936	0.950834	149	149	0.522728	197	2195119	0.986362	2164153	0.985893	35672.1	0.92
2112455-9-P	20	36.2	2328164	349224600	341036229	331095517	0.976553	0.948088	150	150	0.526129	2261790	339032436	333314136	324722331	0.983133	0.957791	149	149	0.52732	197	2236205	0.988688	2216868	0.991353	36149.8	0.92
2112955-2	20	32.4	2487048	373057200	364762043	354436448	0.977764	0.950086	150	150	0.525792	2425198	363535450	357423778	348299472	0.983188	0.958089	149	149	0.526797	192	2415984	0.996201	2401633	0.99406	38726.5	0.92
2112955-21-P	20	35.6	1778840	266826000	260211734	252492701	0.975211	0.946282	150	150	0.525175	1724142	258493830	253970333	247380969	0.982501	0.957009	149	149	0.526675	197	1717731	0.996282	1709313	0.995099	35362.9	0.88
2112976-1-P	20	29.4	3093828	464074200	453534446	440769790	0.977289	0.949783	150	150	0.526146	3007248	450702058	443310737	432264581	0.9836	0.959092	149	149	0.527297	197	2975769	0.989532	2949120	0.991045	37227.8	0.92
2112976-5	20	58	2445020	366753000	357939756	347434436	0.97597	0.947325	150	150	0.529278	2372138	355571750	349491187	340476706	0.982899	0.957547	149	149	0.530626	197	2350544	0.990897	2333096	0.992577	37563.7	0.92
2114543-18-P	20	15.6	1783402	267510300	260497337	252279922	0.973784	0.943066	150	150	0.528159	1725754	258701520	253864044	246901388	0.981301	0.954387	149	149	0.529681	192	1713050	0.992639	1706181	0.99599	33233	0.88
2114543-2	20	54.2	1873770	281065500	273141633	263895002	0.971808	0.938909	150	150	0.511121	1813718	271842752	266143681	258203895	0.979035	0.949828	149	149	0.512615	181	1803911	0.994593	1793709	0.994345	33547.4	0.88
2114645-4-P	20	63.2	2438752	365812800	362585715	356700383	0.991178	0.97509	150	150	0.530513	2436420	365304188	362117979	356278970	0.991278	0.975294	149	149	0.530559	197	2349245	0.96422	2333855	0.993449	37928.4	0.92
2114645-5	20	71.2	2600060	390009000	386425171	379999083	0.990811	0.974334	150	150	0.532638	2597496	389446342	385907943	379533379	0.990914	0.974546	149	149	0.532698	197	2547548	0.980771	2533927	0.994653	39004.5	0.92
2115207-16-P	20	108	2316470	347470500	339075916	328916890	0.975841	0.946604	150	150	0.532923	2246832	336819940	331007307	322269026	0.982743	0.956799	149	149	0.534123	197	2236835	0.995551	2221762	0.993261	36142.7	0.92
2115207-5	20	37.6	2153758	323063700	315375001	306204377	0.976201	0.947814	150	150	0.528279	2089730	313128820	307856288	299973932	0.983162	0.957989	149	149	0.52951	197	2072977	0.991983	2055322	0.991483	36701.9	0.92
2117885-5	20	69.8	2474178	371126700	367652550	361480264	0.990639	0.974008	150	150	0.530385	2471842	370575776	367144773	361020856	0.990741	0.974216	149	149	0.530438	197	2430096	0.983111	2415843	0.994135	38643.9	0.92
2117885-8-P	20	70.8	2221572	333235800	330235635	324868194	0.990997	0.97489	150	150	0.530928	2219320	332767342	329807144	324485777	0.991104	0.975113	149	149	0.530986	197	2184335	0.984236	2171245	0.994007	37948.7	0.92
2118981-1	20	12.6	1909020	286353000	278355772	268921641	0.972072	0.939126	150	150	0.507277	1847738	276925610	271214575	263149263	0.979377	0.950253	149	149	0.508743	197	1838312	0.994899	1827360	0.994042	32113.3	0.84
2118981-2-P	20	31.4	2803284	420492600	410347913	397886439	0.975874	0.946239	150	150	0.531791	2722070	408217536	401054057	390240893	0.982452	0.955963	149	149	0.533004	197	2716373	0.997907	2710646	0.997892	36146	0.88
2119192-15	20	28	2275142	341271300	331364373	320179941	0.970971	0.938198	150	150	0.515534	2193252	328735442	322034953	312666414	0.979617	0.951119	149	149	0.517405	181	2182385	0.995045	2169140	0.993931	36306.3	0.88
2119192-37-P	20	55.6	2983652	447547800	438398393	426995907	0.979557	0.954079	150	150	0.53394	2910438	436419120	429845690	419816764	0.984938	0.961958	149	149	0.534919	197	2901493	0.996927	2893100	0.997107	37890.9	0.92
2119672-12	20	98.6	1453306	217995900	213653785	208059003	0.980082	0.954417	150	150	0.530184	1421276	213069804	209884293	204890750	0.985049	0.961613	149	149	0.531002	192	1415804	0.99615	1408449	0.994805	32430.4	0.88
2119672-33-P	20	60.4	1658708	248806200	242886492	235705075	0.976208	0.947344	150	150	0.530852	1612608	241664918	237384691	231101724	0.982289	0.95629	149	149	0.53184	192	1602552	0.993764	1590290	0.992348	33303.8	0.88
2120354-23-P	20	24.2	2402358	360353700	357572648	352069666	0.992282	0.977011	150	150	0.527818	2401580	360065718	357302010	351820066	0.992324	0.9771	149	149	0.527827	192	2388225	0.994439	2377952	0.995698	35605.3	0.84
2120354-9	20	9.72	2550432	382564800	378997648	372367455	0.990676	0.973345	150	150	0.52268	2549346	382129124	378587515	371987861	0.990732	0.973461	149	149	0.52269	192	2515006	0.98653	2500509	0.994236	37185.4	0.88
2120399-10-P	20	48.4	2689786	403467900	395056705	384463723	0.979153	0.952898	150	150	0.531132	2624086	393459912	387342010	377976480	0.984451	0.960648	149	149	0.532065	197	2613518	0.995973	2600553	0.995039	38220.4	0.92
2120399-7	20	104	2600994	390149100	380600574	369399794	0.975526	0.946817	150	150	0.531805	2521966	377970678	371382120	361781792	0.982569	0.957169	149	149	0.533032	192	2505350	0.993411	2485928	0.992248	37510.5	0.92
2121315-14-P	20	25.6	2079220	311883000	309287096	304174978	0.991677	0.975286	150	150	0.527326	2078446	311633312	309054295	303962367	0.991724	0.975385	149	149	0.527344	192	2069166	0.995535	2060063	0.995601	37319.9	0.84
2121315-6	20	14.6	1952522	292878300	290363711	285528635	0.991414	0.974905	150	150	0.524735	1951738	292585296	290088982	285275834	0.991468	0.975018	149	149	0.524745	192	1935993	0.991933	1927005	0.995357	33071.2	0.8
2121324-14-P	20	61.8	2299578	344936700	342091514	336893006	0.991752	0.976681	150	150	0.533715	2298068	344609560	341793598	336631237	0.991829	0.976848	149	149	0.533752	197	2277741	0.991155	2270201	0.99669	37056.1	0.92
2121324-6	20	39.8	1662858	249428700	247178342	243143019	0.990978	0.9748	150	150	0.532047	1661404	249048044	246824445	242819768	0.991072	0.974992	149	149	0.532094	192	1637706	0.985736	1618494	0.988269	33806.8	0.92
2121424-25-P	20	49.6	2308870	346330500	343833081	338635429	0.992789	0.977781	150	150	0.537139	2308222	346081692	343598633	338418160	0.992825	0.977856	149	149	0.537152	192	2297898	0.995527	2288836	0.996056	38320.1	0.88
2121424-7	20	16.9	1260924	189138600	187539012	184451089	0.991543	0.975217	150	150	0.527845	1260500	188953008	187363775	184287738	0.991589	0.97531	149	149	0.527853	192	1253400	0.994367	1246504	0.994498	30906.9	0.84
2121745-17-P	20	92.2	2924526	438678900	435013763	427616319	0.991645	0.974782	150	150	0.533894	2923438	438080746	434443780	427079669	0.991698	0.974888	149	149	0.533907	192	2894032	0.989941	2875574	0.993622	39376	0.88
2121745-4	20	44.4	2154994	323249100	320765260	315686668	0.992316	0.976605	150	150	0.53508	2154346	322924190	320456205	315397238	0.992357	0.976691	149	149	0.535089	197	2142379	0.994445	2129207	0.993852	38469.3	0.92
2122236-14-P	20	63.2	2412064	361809600	353749635	343822572	0.977723	0.950286	150	150	0.532885	2346764	351617270	345937683	337293679	0.983847	0.959264	149	149	0.533927	181	2325527	0.990951	2303278	0.990433	37092.9	0.92
2122236-2	20	96.8	2669494	400424100	390916199	379708920	0.976255	0.948267	150	150	0.535136	2587080	387653412	381306893	371783359	0.983628	0.959061	149	149	0.536474	197	2566615	0.99209	2544897	0.991538	37735.8	0.92
2122474-18-P	20	46.2	1928660	289299000	286439989	281294429	0.990117	0.972331	150	150	0.528805	1926774	288775334	285953769	280851509	0.990229	0.972561	149	149	0.528874	197	1833100	0.951383	1811347	0.988133	36704.9	0.92
2122474-5	20	35.8	1982344	297351600	294616777	289693822	0.990803	0.974247	150	150	0.533617	1980490	296910382	294208307	289322448	0.990899	0.974444	149	149	0.533657	192	1951196	0.985209	1941095	0.994823	36635.6	0.92
2123754-1-P	20	78.2	2020134	303020100	300948185	296621599	0.993162	0.978884	150	150	0.534607	2019584	302831014	300771314	296459335	0.993199	0.97896	149	149	0.534622	192	2006407	0.993475	2000682	0.997147	37497.4	0.88
2123754-1	20	70.4	2595128	389269200	386221188	379998447	0.99217	0.976184	150	150	0.535438	2594260	388946100	385918433	379719631	0.992216	0.976278	149	149	0.535451	192	2571739	0.991319	2561918	0.996181	39207	0.88
2123975-1	20	23.8	2227800	334170000	331363241	325782681	0.991601	0.974901	150	150	0.532455	2226964	333952778	331163416	325603162	0.991647	0.974998	149	149	0.532474	192	2213309	0.993868	2207182	0.997232	36696.9	0.88
2123975-23-P	20	25.8	2532868	379930200	376967846	371016607	0.992203	0.976539	150	150	0.532184	2532018	379691002	376747455	370818061	0.992248	0.976631	149	149	0.532203	192	2520549	0.99547	2514406	0.997563	37676.2	0.84
2124496-1	20	23.8	2176812	326521800	324065425	319044264	0.992477	0.977099	150	150	0.535494	2176098	326323472	323882241	318879038	0.992519	0.977187	149	149	0.535509	197	2169165	0.996814	2163127	0.997216	37331.8	0.92
2124496-13-P	20	35.8	2205120	330768000	328151794	322938545	0.992091	0.976329	150	150	0.530872	2204358	330452190	327854896	322664761	0.99214	0.976434	149	149	0.530883	192	2193395	0.995027	2181832	0.994728	38457.9	0.92
2125583-13-P	20	43.6	2611484	391722600	383081901	372406322	0.977942	0.950689	150	150	0.533936	2542130	381078552	374926197	365582586	0.983855	0.959337	149	149	0.53497	192	2526868	0.993996	2512764	0.994418	37561	0.92
2125583-6	20	70.4	1722760	258414000	252819868	245916165	0.978352	0.951636	150	150	0.528667	1678602	251633146	247642018	241568543	0.984139	0.960003	149	149	0.529652	197	1667988	0.993677	1658558	0.994346	33483.5	0.92
2125702-2	20	33.6	2155534	323330100	320372188	314697892	0.990852	0.973302	150	150	0.529279	2154566	322848668	319915839	314271095	0.990916	0.973432	149	149	0.529284	192	2135662	0.991226	2118491	0.99196	37837.8	0.88
2125702-29-P	20	68	2633350	395002500	392052481	386000771	0.992532	0.977211	150	150	0.533455	2632560	394671924	391741295	385712947	0.992575	0.9773	149	149	0.533469	192	2617538	0.994294	2607061	0.995997	39278.9	0.88
2125829-1	20	48.8	2012250	301837500	299512657	294968329	0.992298	0.977242	150	150	0.528196	2011666	301469392	299160481	294635279	0.992341	0.977331	149	149	0.528196	192	1996425	0.992424	1980806	0.992177	37917.8	0.88
2125829-25-P	20	42.4	2355092	353263800	350897116	345970681	0.993301	0.979355	150	150	0.536157	2354460	352961416	350609929	345701527	0.993338	0.979431	149	149	0.536167	192	2337222	0.992679	2326908	0.995587	38384.6	0.88
2126093-22-P	20	41	2180484	327072600	324468406	319157701	0.992038	0.975801	150	150	0.533508	2179744	326844280	324256357	318964797	0.992082	0.975892	149	149	0.533519	197	2170590	0.9958	2163712	0.996831	37838	0.88
2126093-5	20	47.8	2241734	336260100	333423539	327934992	0.991564	0.975242	150	150	0.531757	2240886	335921944	333104916	327640305	0.991614	0.975347	149	149	0.531774	192	2224341	0.992617	2213695	0.995214	37465.2	0.88
2126297-15-P	20	23	2222046	333306900	330623521	325205446	0.991949	0.975694	150	150	0.527551	2221260	333118674	330450973	325051897	0.991992	0.975784	149	149	0.527571	197	2215653	0.997476	2210289	0.997579	38288	0.92
2126297-5	20	16.1	1936248	290437200	287925228	283046360	0.991351	0.974553	150	150	0.527293	1935498	290180174	287684009	282823881	0.991398	0.974649	149	149	0.527308	181	1924460	0.994297	1912757	0.993919	37151.2	0.92
2126326-25-P	20	49.4	2425020	363753000	360984766	355033851	0.99239	0.97603	150	150	0.538162	2424236	363485712	360735620	354806315	0.992434	0.976122	149	149	0.538173	192	2414698	0.996066	2407313	0.996942	38154.7	0.88
2126326-7	20	35.8	2444048	366607200	363288908	356959341	0.990949	0.973683	150	150	0.529145	2442932	366180940	362889692	356592429	0.991012	0.973815	149	149	0.52916	192	2427229	0.993572	2414676	0.994828	38093.6	0.88
2126358-21-P	20	21.8	2197826	329673900	326703038	320985857	0.990988	0.973647	150	150	0.52489	2197050	329415572	326461677	320765170	0.991033	0.97374	149	149	0.524901	192	2188733	0.996214	2178066	0.995126	36620.7	0.88
2126358-5	20	21.2	2341940	351291000	348479083	342779408	0.991995	0.975771	150	150	0.529459	2341180	351095554	348299692	342619250	0.992037	0.975858	149	149	0.529473	197	2335063	0.997387	2328706	0.997278	38822.2	0.92
2127218-16-P	20	102	3289382	493407300	480857495	465944561	0.974565	0.944341	150	150	0.533825	3180470	476838470	468493341	455887653	0.982499	0.956063	149	149	0.535193	197	3164991	0.995133	3150767	0.995506	37998.4	0.92
2127218-5	20	104	2460714	369107100	360241863	349769902	0.975982	0.947611	150	150	0.52952	2385472	357514798	351507311	342565091	0.983197	0.958184	149	149	0.530822	192	2370057	0.993538	2353667	0.993085	38196.9	0.92
2127332-3-P	20	67	2187442	328116300	324953294	319551891	0.99036	0.973898	150	150	0.522926	2185904	327627900	324497893	319135453	0.990446	0.974079	149	149	0.522966	192	2167018	0.99136	2145730	0.990176	38103.1	0.92
2127332-5	20	69.2	2141080	321162000	318334975	313132691	0.991198	0.974999	150	150	0.531191	2139042	320615250	317828459	312674960	0.991308	0.975234	149	149	0.531259	197	2071252	0.968308	2059964	0.99455	36948.4	0.92
2127501-17-P	20	20.6	2043630	306544500	304083595	299059828	0.991972	0.975584	150	150	0.52736	2043008	306347346	303900266	298893302	0.992012	0.975668	149	149	0.527375	197	2035902	0.996522	2028844	0.996533	38156	0.92
2127501-6	20	25.2	2057284	308592600	306065084	300913610	0.99181	0.975116	150	150	0.530992	2056552	308392266	305879616	300745876	0.991852	0.975206	149	149	0.53101	197	2050682	0.997146	2043266	0.996384	37856.5	0.92
2128435-19-P	20	76	1904104	285615600	282865590	277941003	0.990372	0.97313	150	150	0.528911	1902232	285227324	282511818	277626225	0.99048	0.973351	149	149	0.52898	197	1852176	0.973686	1844047	0.995611	35910.3	0.88
2128435-5	20	50	2633074	394961100	391312208	384706398	0.990761	0.974036	150	150	0.525472	2630420	394322224	390722250	384174624	0.99087	0.974266	149	149	0.525528	197	2498019	0.949665	2466658	0.987446	38017.1	0.92
2128916-27-P	20	16.7	2129976	319496400	316159546	310044207	0.989556	0.970415	150	150	0.520069	2129018	319142492	315826314	309734846	0.989609	0.970522	149	149	0.520077	181	2117380	0.994534	2096989	0.99037	36340.7	0.92
2128916-6	20	9.62	1524942	228741300	226570213	222726675	0.990509	0.973706	150	150	0.509671	1524368	228502118	226344543	222517191	0.990558	0.973808	149	149	0.509669	196	1517861	0.995731	1500839	0.988786	30412.8	0.88
2129804-36	20	67.2	2873478	431021700	418797028	404793222	0.971638	0.939148	150	150	0.52492	2767060	414503382	406520093	394894755	0.98074	0.952694	149	149	0.52655	192	2715423	0.981339	2688906	0.990235	37176.8	0.92
2129804-39-P	20	69	2846602	426990300	418623172	408215566	0.980404	0.95603	150	150	0.529903	2779968	416761836	410751198	401548036	0.985578	0.963495	149	149	0.530813	197	2751391	0.98972	2736403	0.994553	37717.4	0.92
2129902-10	20	79.2	3040536	456080400	445015715	431506777	0.97574	0.94612	150	150	0.528992	2952288	442552886	434756152	423036168	0.982382	0.9559	149	149	0.530161	197	2929351	0.992231	2908678	0.992943	37995.2	0.92
2129902-22-P	20	93	2538118	380717700	372168397	361829535	0.977544	0.950388	150	150	0.530954	2467082	369957058	364026732	355067721	0.98397	0.959754	149	149	0.532073	197	2457275	0.996025	2447963	0.99621	36250.9	0.92
2130197-10-P	20	35.8	2366198	354929700	352184115	346590110	0.992264	0.976504	150	150	0.528378	2365448	354736832	352006757	346431380	0.992304	0.976587	149	149	0.528395	197	2357841	0.996784	2350589	0.996924	37752.2	0.92
2130197-6	20	28	2006920	301038000	298426321	293344449	0.991324	0.974443	150	150	0.521948	2006224	300831046	298234582	293170842	0.991369	0.974537	149	149	0.521968	197	1996197	0.995002	1986537	0.995161	38116.9	0.92
21N	20	58	2895784	434367600	421239080	408668194	0.969776	0.940835	150	150	0.52508	2756234	413000710	406652269	397427663	0.984628	0.962293	149	149	0.525268	197	2738343	0.993509	2637905	0.963322	39707	0.92
21P	20	57.2	2344316	351647400	346234036	339703443	0.984606	0.966034	150	150	0.528253	2308906	346117312	342432308	336605604	0.989353	0.972519	149	149	0.529013	192	2298286	0.9954	2282720	0.993227	38640.9	0.88
2200721-13-P	20	93	2713228	406984200	398667805	388062412	0.979566	0.953507	150	150	0.531766	2648286	397097644	391065158	381658448	0.984809	0.96112	149	149	0.532605	197	2635369	0.995123	2624997	0.996064	36952.3	0.92
2200721-5	20	42.8	3085972	462895800	451771535	438312825	0.975968	0.946893	150	150	0.530673	2994362	448947320	441212813	429621799	0.982772	0.956954	149	149	0.531846	197	2978407	0.994672	2965352	0.995617	38173.7	0.92
2201054-23-P	20	23.2	2212194	331829100	329261092	323948047	0.992261	0.97625	150	150	0.532101	2211646	331678142	329121969	323823281	0.992293	0.976318	149	149	0.532113	180	2205312	0.997136	2201215	0.998142	37396.8	0.88
2201054-3	20	26.8	2095866	314379900	312340829	308163930	0.993514	0.980228	150	150	0.530604	2095408	314258716	312229091	308063120	0.993542	0.980285	149	149	0.530612	180	2091393	0.998084	2087319	0.998052	36458.5	0.84
2201191-4	20	116	2673340	401001000	391629504	380120981	0.97663	0.94793	150	150	0.527076	2600318	389760378	383067858	372994263	0.982829	0.956984	149	149	0.528164	192	2575651	0.990514	2554532	0.991801	37708.3	0.92
2201191-5-P	20	114	2682874	402431100	392335501	380505070	0.974913	0.945516	150	150	0.527285	2596374	389237336	382477373	372403827	0.982633	0.956753	149	149	0.5286	197	2575551	0.99198	2557833	0.993121	36309.2	0.92
2201703-12-P	20	102	3646332	546949800	535655453	522062701	0.97935	0.954498	150	150	0.528231	3550908	532400404	524547677	512736361	0.98525	0.963065	149	149	0.529269	197	3530027	0.99412	3514409	0.995576	39055.4	0.92
2201703-5	20	99	3083522	462528300	451594985	438434713	0.976362	0.947909	150	150	0.530202	2992394	448529834	440988874	429674358	0.983187	0.957962	149	149	0.531327	197	2971470	0.993008	2952833	0.993728	38281.2	0.92
2201807-3-P	20	29	1718132	257719800	255639193	251441739	0.991927	0.97564	150	150	0.52792	1717506	257544022	255476895	251295648	0.991974	0.975739	149	149	0.527938	197	1710681	0.996026	1705168	0.996777	36449.4	0.92
2201807-9	20	24.8	2172818	325922700	323487286	318424776	0.992528	0.976995	150	150	0.530899	2172098	325759460	323338826	318294352	0.992569	0.977084	149	149	0.530916	197	2167819	0.99803	2163901	0.998193	36685.6	0.88
2202205-3	20	31	2288782	343317300	340498292	334888618	0.991789	0.975449	150	150	0.52917	2287936	343075996	340274940	334686804	0.991835	0.975547	149	149	0.529186	197	2279415	0.996276	2269654	0.995718	39177.9	0.92
2202205-6-P	20	30.8	1359930	203989500	202263456	198864958	0.991539	0.974878	150	150	0.526374	1359426	203838592	202123388	198737667	0.991585	0.974976	149	149	0.526387	197	1353791	0.995855	1346328	0.994487	33222.2	0.92
2202360-1-P	20	60.8	2533282	379992300	377169115	371376186	0.99257	0.977326	150	150	0.531943	2532404	379748308	376943318	371171975	0.992614	0.977416	149	149	0.53196	181	2522759	0.996191	2515639	0.997178	39104.1	0.92
2202360-12	20	22.6	1272340	190851000	189582216	186834575	0.993352	0.978955	150	150	0.539777	1272026	190719808	189458205	186718779	0.993385	0.979021	149	149	0.539786	192	1264193	0.993842	1260231	0.996866	29920.1	0.88
2203032-21-P	20	38.8	2012650	301897500	298819612	293445650	0.989805	0.972004	150	150	0.53156	2010526	301432272	298393112	293062838	0.989918	0.972234	149	149	0.531621	192	1973047	0.981359	1955093	0.9909	36254.4	0.88
2203032-7	20	59.4	1954008	293101200	290429478	285580130	0.990885	0.97434	150	150	0.523772	1952156	292649474	290011504	285200713	0.990986	0.974547	149	149	0.523884	197	1905193	0.975943	1895082	0.994693	38027	1
2203579-3	20	32.4	2364614	354692100	351696684	345816059	0.991555	0.974975	150	150	0.526552	2363864	354435974	351458058	345598287	0.991598	0.975065	149	149	0.526566	192	2351096	0.994599	2342471	0.996331	37396.1	0.88
2203579-5-P	20	41	1777322	266598300	264785844	261023995	0.993202	0.979091	150	150	0.528868	1776898	266497356	264693950	260943096	0.993233	0.979158	149	149	0.528879	197	1773265	0.997955	1770090	0.99821	34797.5	0.92
2203705-22-P	20	85.2	2810262	421539300	411431471	399121152	0.976022	0.946818	150	150	0.530244	2729120	409101978	401996192	391334703	0.982631	0.95657	149	149	0.53139	197	2708799	0.992554	2689772	0.992976	37852.3	0.92
2203705-5	20	65.4	1944950	291742500	283486211	274014551	0.9717	0.939234	150	150	0.527072	1876024	280878116	275320120	267365980	0.980212	0.951893	149	149	0.528764	192	1852191	0.987296	1824127	0.984848	35553.5	0.92
2204584-16-P	20	43.6	2688688	403303200	394484095	383558042	0.978133	0.951041	150	150	0.534767	2616950	392410082	386150869	376634936	0.984049	0.959799	149	149	0.535793	197	2611972	0.998098	2603236	0.996655	37720.7	0.92
2204584-8	20	21.8	1973912	296086800	288217057	278963667	0.973421	0.942169	150	150	0.519246	1911872	286558120	280971148	273068640	0.980503	0.952926	149	149	0.52068	181	1900793	0.994205	1882497	0.990375	36323	0.92
2205038-4	20	40.6	2302402	345360300	342358369	336414367	0.991308	0.974097	150	150	0.527595	2301548	345118980	342136668	336215691	0.991359	0.974202	149	149	0.527611	181	2289558	0.99479	2283442	0.997329	37441.7	0.88
2205038-7-P	20	40.8	2444606	366690900	364414083	359435749	0.993791	0.980215	150	150	0.532766	2444074	366584158	364317076	359350673	0.993816	0.980268	149	149	0.53278	180	2440179	0.998406	2437376	0.998851	35503	0.92
2205876-26-P	20	34.2	2273786	341067900	338208525	333018241	0.991616	0.976399	150	150	0.533561	2271744	340668092	337843583	332693054	0.991709	0.97659	149	149	0.533608	197	2240342	0.986177	2232755	0.996613	36102.1	0.88
2205876-6	20	38.2	2104632	315694800	312816953	307698126	0.990884	0.97467	150	150	0.530056	2102694	315268924	312426498	307347867	0.990984	0.974875	149	149	0.530106	192	2063067	0.981154	2053420	0.995324	36609.8	0.84
2206205-10-P	20	48	1918626	287793900	285527430	280889427	0.992125	0.976009	150	150	0.52959	1917966	287637652	285384433	280762962	0.992166	0.976099	149	149	0.529608	197	1914197	0.998035	1908818	0.99719	36721.9	0.92
2206205-7	20	52.6	2217200	332580000	329709627	323986895	0.991369	0.974162	150	150	0.527025	2216440	332334704	329481075	323778096	0.991413	0.974253	149	149	0.52704	181	2207404	0.995923	2199727	0.996522	38132.9	0.88
2206554-11	20	18.7	1983944	297591600	295114018	290290252	0.991675	0.975465	150	150	0.524073	1983304	297347634	294883972	290077209	0.991715	0.975549	149	149	0.524081	181	1971949	0.994275	1958382	0.99312	36343	0.88
2206554-17-P	20	50	2378892	356833800	354142296	348549861	0.992457	0.976785	150	150	0.533939	2378120	356616046	353941479	348368989	0.9925	0.976874	149	149	0.53395	197	2370576	0.996828	2364554	0.99746	38529.6	0.92
2207154-11-P	20	30	2114088	317113200	314466574	309129089	0.991654	0.974823	150	150	0.530236	2113288	316908374	314278209	308959775	0.991701	0.974918	149	149	0.530251	197	2107258	0.997147	2099235	0.996193	38285.7	0.88
2207154-3	20	20.6	1913320	286998000	284312599	279361863	0.990643	0.973393	150	150	0.517007	1912608	286705376	284037694	279107937	0.990695	0.973501	149	149	0.517015	196	1899729	0.993266	1889510	0.994621	34243.9	0.92
2207237-19-P	20	16.5	1370094	205514100	203346872	199668832	0.989455	0.971558	150	150	0.528189	1368676	205124292	202984247	199336827	0.989567	0.971786	149	149	0.528237	192	1338587	0.978016	1325864	0.990495	32436.6	0.88
2207237-5	20	38.6	1807882	271182300	268553197	263906962	0.990305	0.973172	150	150	0.52964	1805980	270757996	268163937	263557907	0.990419	0.973408	149	149	0.529712	197	1753680	0.971041	1743553	0.994225	35820.4	0.88
2207384-15-P	20	80.2	3384150	507622500	496554572	482795032	0.978197	0.951091	150	150	0.535926	3293882	493882006	486045167	474084615	0.984132	0.959915	149	149	0.536932	197	3280036	0.995796	3270135	0.996981	37526.5	0.92
2207384-2	20	112	2785918	417887700	408403140	396616932	0.977304	0.949099	150	150	0.530831	2709540	406238440	399548350	389301334	0.983532	0.958307	149	149	0.531905	192	2694466	0.994437	2686531	0.997055	36952.4	0.92
2208071-19-P	20	32.6	1614980	242247000	240269081	236390790	0.991835	0.975825	150	150	0.528652	1614436	242078582	240112776	236248996	0.991879	0.975919	149	149	0.528665	192	1608481	0.996311	1600281	0.994902	34844.5	0.88
2208071-8	20	60.2	2169624	325443600	323354361	319048690	0.99358	0.98035	150	150	0.533207	2169194	325278634	323199159	318905468	0.993607	0.980407	149	149	0.533215	192	2163162	0.997219	2154746	0.996109	38766.3	0.88
2208154-17-P	20	39.2	1950312	292546800	289967861	284978393	0.991185	0.974129	150	150	0.529339	1949548	292317646	289755351	284785493	0.991235	0.974233	149	149	0.529356	196	1939859	0.99503	1930567	0.99521	36489.2	0.88
2208154-4	20	26.8	2117006	317550900	314562266	308928638	0.990588	0.972848	150	150	0.522065	2116136	317223092	314254705	308644284	0.990643	0.972957	149	149	0.522082	196	2102050	0.993344	2090037	0.994285	36642.9	0.88
2208401-18-P	20	43.8	2369918	355487700	352761234	347070737	0.99233	0.976323	150	150	0.535061	2369160	355219328	352509311	346839434	0.992371	0.976409	149	149	0.535078	181	2361058	0.99658	2349401	0.995063	39091.7	0.92
2208401-4	20	95.6	2279064	341859600	339278868	334038153	0.992451	0.977121	150	150	0.532937	2278348	341590256	339026225	333805802	0.992494	0.977211	149	149	0.53295	181	2269985	0.996329	2260723	0.99592	38743.6	0.88
2208788-4	20	24.2	1686658	252998700	250701726	246554418	0.990921	0.974528	150	150	0.523977	1684984	252643708	250376314	246262603	0.991025	0.974743	149	149	0.524045	197	1648046	0.978078	1639897	0.995055	35891.4	0.96
2208788-9-P	20	76.2	1910956	286643400	283970088	279223921	0.990674	0.974116	150	150	0.529271	1909024	286271374	283631300	278921963	0.990778	0.974327	149	149	0.52933	197	1882790	0.986258	1874163	0.995418	35754.5	0.92
2208912-11-P	20	42.8	2258974	338846100	336265545	330975861	0.992384	0.976773	150	150	0.534482	2258308	338615090	336049638	330777942	0.992424	0.976855	149	149	0.534493	180	2250110	0.99637	2239500	0.995285	38897.2	0.92
2208912-3	20	37.6	1810202	271530300	268922167	264031017	0.990395	0.972381	150	150	0.524451	1809426	271249564	268659541	263790020	0.990452	0.972499	149	149	0.52446	196	1801288	0.995502	1788163	0.992714	34995.6	0.88
2209344-12	20	34	2221260	333189000	329893924	323807784	0.99011	0.971844	150	150	0.517267	2220376	332750460	329477263	323418219	0.990163	0.971954	149	149	0.517263	181	2211508	0.996006	2190683	0.990583	35219.7	0.88
2209344-20-P	20	27	2167842	325176300	321694272	315460695	0.989292	0.970122	150	150	0.516878	2166736	324669170	321214720	315013780	0.98936	0.970261	149	149	0.516873	181	2156201	0.995138	2132361	0.988944	36306.7	0.92
2209929-1-P	20	45	1942284	291342600	288662532	283847119	0.990801	0.974273	150	150	0.529519	1940560	290899452	288250638	283471396	0.990894	0.974465	149	149	0.529557	197	1909572	0.984031	1893129	0.991389	35974.4	0.92
2209929-6	20	20.8	1674554	251183100	248237777	243262526	0.988274	0.968467	150	150	0.523929	1672500	250590958	247685726	242756138	0.988406	0.968735	149	149	0.523999	197	1610097	0.962689	1585072	0.984457	34851.7	0.92
2210007-3-P	20	34.8	2375340	356301000	353589516	347947599	0.99239	0.976555	150	150	0.532452	2374634	356096536	353399408	347774679	0.992426	0.97663	149	149	0.532463	197	2366381	0.996525	2357786	0.996368	39549.4	0.92
2210007-6	20	26.8	1879422	281913300	279313919	274326358	0.99078	0.973088	150	150	0.52301	1878620	281561962	278980991	274015528	0.990833	0.973198	149	149	0.523016	181	1856227	0.98808	1840717	0.991644	35956.8	0.88
2210082-1	20	26	2501978	375296700	372168563	365926396	0.991665	0.975032	150	150	0.526966	2501094	374990028	371880416	365660893	0.991707	0.975122	149	149	0.526977	197	2490002	0.995565	2480248	0.996083	39601.8	0.92
2210082-9-P	20	12.7	2227960	334194000	331766469	326722704	0.992736	0.977644	150	150	0.530319	2227376	334089406	331672560	326641297	0.992766	0.977706	149	149	0.530337	197	2225648	0.999224	2225163	0.999782	31147.4	0.76
2210085-1	20	104	1882966	282444900	279661705	274681214	0.990146	0.972513	150	150	0.527947	1881094	282056718	279306355	274363655	0.990249	0.972725	149	149	0.527995	197	1856901	0.987139	1846511	0.994405	36483	0.92
2210085-7-P	20	54.2	2318612	347791800	344651628	339015994	0.990971	0.974767	150	150	0.528169	2316488	347308610	344207248	338616179	0.99107	0.974972	149	149	0.528226	197	2273725	0.98154	2259784	0.993869	38026.9	0.92
2210522-07-P	20	19	1800406	270060900	267838356	263369536	0.99177	0.975223	150	150	0.529677	1799766	269897810	267688382	263235520	0.991814	0.975316	149	149	0.529693	197	1793869	0.996723	1788734	0.997137	36876.1	0.88
2210522-1	20	27	2430060	364509000	361572075	355681611	0.991943	0.975783	150	150	0.53086	2429266	364259154	361340792	355472974	0.991988	0.975879	149	149	0.530875	192	2419635	0.996035	2412093	0.996883	39142.6	0.88
2214740-20-P	20	22.4	2125960	318894000	316691474	312161476	0.993093	0.978888	150	150	0.526245	2125410	318760086	316568476	312051742	0.993125	0.978955	149	149	0.526254	197	2120870	0.997864	2115134	0.997295	37601.1	0.92
2214740-4	20	17.5	2232244	334836600	331618592	325495009	0.990389	0.972101	150	150	0.519621	2231382	334592904	331393959	325293278	0.990439	0.972206	149	149	0.51964	180	2224463	0.996899	2215652	0.996039	36404	0.92
2215007-5	20	38.4	2082076	312311400	309689501	304406064	0.991605	0.974688	150	150	0.52551	2081386	312100656	309493888	304228562	0.991648	0.974777	149	149	0.525524	181	2072761	0.995856	2064775	0.996147	38400.9	0.92
2215007-6-P	20	37.4	1917812	287671800	285218644	280274878	0.991472	0.974287	150	150	0.528787	1917102	287483520	285045146	280119273	0.991518	0.974384	149	149	0.528804	197	1910771	0.996698	1904098	0.996508	37532.4	0.92
2215078-12-P	20	31.8	2091158	313673700	306881984	298615703	0.978348	0.951995	150	150	0.541107	2035036	305228836	300440246	293294560	0.984311	0.960901	149	149	0.542364	197	2031390	0.998208	2030705	0.999663	27323.7	0.76
2215078-3	20	39.2	1939944	290991600	284702980	277031040	0.978389	0.952024	150	150	0.529415	1888584	283191520	278769674	272087526	0.984386	0.96079	149	149	0.530456	197	1881465	0.996231	1874424	0.996258	34753.4	0.92
2215115-13	20	25.2	2090424	313563600	310719322	305250285	0.990929	0.973488	150	150	0.525247	2089600	313354194	310527521	305079041	0.990979	0.973592	149	149	0.525265	197	2084537	0.997577	2077770	0.996754	37815.3	0.92
2215115-5-P	20	29.4	2507132	376069800	373149324	367259815	0.992234	0.976574	150	150	0.530204	2506272	375881842	372978485	367109929	0.992276	0.976663	149	149	0.530221	197	2502043	0.998313	2497319	0.998112	39665.1	0.92
2215529-4-P	20	58.4	3008970	451345500	442416089	431157142	0.980216	0.955271	150	150	0.531645	2935810	440268212	433918442	424041236	0.985577	0.963143	149	149	0.532572	197	2929762	0.99794	2924987	0.99837	36169.5	0.92
2215529-8	20	49	2749722	412458300	403022847	391789644	0.977124	0.949889	150	150	0.534593	2668656	400149778	393714931	384109161	0.983919	0.959913	149	149	0.53594	197	2658378	0.996149	2652441	0.997767	37345.4	0.88
2216304-11-P	20	57	2988148	448222200	437453837	424705433	0.975975	0.947533	150	150	0.53342	2896066	434234704	426897196	416034512	0.983102	0.958087	149	149	0.534745	197	2886110	0.996562	2877367	0.996971	37519	0.92
2216304-3	20	42	2559530	383929500	375008270	364272041	0.976763	0.948799	150	150	0.524714	2488012	373068730	366747517	357465703	0.983056	0.958177	149	149	0.525948	197	2481770	0.997491	2473894	0.996826	36812.2	0.88
2218475-14-P	20	18.6	2047346	307101900	304557505	299624427	0.991715	0.975651	150	150	0.528141	2046718	306852986	304323204	299407678	0.991756	0.975737	149	149	0.528155	192	2031955	0.992787	2022139	0.995169	36524.2	0.88
2218475-5	20	16.3	2218350	332752500	329761907	323985964	0.991013	0.973654	150	150	0.525593	2217434	332488782	329518590	323766839	0.991067	0.973768	149	149	0.525612	192	2207829	0.995668	2200369	0.996621	37447.3	0.92
2218490-14-P	20	19.6	1750346	262551900	260298329	255901829	0.991417	0.974671	150	150	0.527662	1749754	262385274	260143777	255761264	0.991457	0.974755	149	149	0.527675	197	1744686	0.997104	1739852	0.997229	35448.2	0.92
2218490-3	20	16.3	1966094	294914100	292344318	287339350	0.991286	0.974315	150	150	0.526226	1965288	294711438	292159081	287174986	0.991339	0.974428	149	149	0.526246	180	1961402	0.998023	1955698	0.997092	36557.6	0.92
2221241-10	20	67.4	1501198	225179700	223456460	219955517	0.992347	0.9768	150	150	0.524972	1500808	225046714	223332398	219841874	0.992382	0.976872	149	149	0.524983	197	1494908	0.996069	1489118	0.996127	33787.7	0.88
2221241-20-P	20	52.4	1501114	225167100	223343692	219685667	0.991902	0.975656	150	150	0.528191	1500582	225040542	223228441	219584055	0.991948	0.975753	149	149	0.528207	197	1495561	0.996654	1491888	0.997544	34464.7	0.92
22N	20	79.6	2807226	421083900	411960540	401663239	0.978334	0.953879	150	150	0.525516	2736528	410281914	404457231	395648651	0.985803	0.964334	149	149	0.526636	197	2727483	0.996695	2699858	0.989872	39880	0.92
22P	20	44.4	2937388	440608200	426864584	412978047	0.968808	0.937291	150	150	0.511891	2812762	421354316	413519427	402518617	0.981405	0.955297	149	149	0.513138	192	2788783	0.991475	2666897	0.956294	39378	0.92
23N	20	78.2	2964424	444663600	433821859	422669278	0.975618	0.950537	150	150	0.524571	2863770	429307036	423426151	414570725	0.986301	0.965674	149	149	0.525677	192	2852367	0.996018	2802014	0.982347	39934.5	0.92
23P	20	38.6	1941606	291240900	281170073	272110703	0.965421	0.934315	150	150	0.518818	1828652	274087168	269716262	263406966	0.984053	0.961034	149	149	0.521723	197	1816792	0.993514	1784327	0.982131	37742.1	0.92
24N	20	26.4	1348010	202201500	197369707	192159248	0.976104	0.950335	150	150	0.524901	1307080	195969466	193106590	188782503	0.985391	0.963326	149	149	0.526404	192	1301322	0.995595	1285438	0.987794	32070.9	0.92
24P	20	74	2504204	375630600	362348436	349674532	0.96464	0.9309	150	150	0.522867	2367406	350572418	344345404	335298665	0.982238	0.956432	148	148	0.523794	192	2317023	0.978718	1854215	0.800257	37170.5	0.88
25N	20	85.8	2819832	422974800	415523632	406429853	0.982384	0.960884	150	150	0.526695	2771140	415529986	410365387	402244579	0.987571	0.968028	149	149	0.527461	192	2766122	0.998189	2745708	0.99262	39265.3	0.92
25P	20	56.2	3379494	506924100	493125586	479582084	0.97278	0.946063	150	150	0.522835	3243976	486227730	479251952	468965387	0.985653	0.964497	149	149	0.525181	197	3227118	0.994803	3157251	0.97835	40375.6	0.92
26N	20	73.4	3063040	459456000	447593928	435161971	0.974182	0.947124	150	150	0.526319	2955264	443019618	436336835	426350436	0.984915	0.962374	149	149	0.528102	197	2938595	0.99436	2890747	0.983717	40143	0.92
26P	20	38.4	1637780	245667000	239374775	232681040	0.974387	0.94714	150	150	0.51015	1587386	237599686	233824224	228218631	0.98411	0.960517	149	149	0.511432	192	1568109	0.987856	1466687	0.935322	31697.6	0.88
27N	20	77.6	2672498	400874700	387355347	374463279	0.966275	0.934116	150	150	0.524154	2530174	379163682	372621439	363204872	0.982746	0.95791	149	149	0.526009	192	2512182	0.992889	2417475	0.962301	39520.9	0.92
27P	20	46.4	2391624	358743600	350189090	340971174	0.976154	0.950459	150	150	0.510977	2327854	348826864	343313529	335476717	0.984195	0.961728	149	149	0.512106	192	2312110	0.993237	2279156	0.985747	36929.8	0.92
28N	20	89.2	3162308	474346200	463036295	450809367	0.976157	0.95038	150	150	0.527576	3068108	459837166	453056557	442965892	0.985254	0.96331	149	149	0.529001	192	3052780	0.995004	3011301	0.986413	39842.7	0.92
28P	20	52.6	1851910	277786500	269094548	260251409	0.96871	0.936876	150	150	0.503042	1781386	266801398	261465174	254251451	0.979999	0.952961	149	149	0.504285	181	1769611	0.99339	1727500	0.976203	30679.5	0.88
29N	20	57.6	2017948	302692200	293816529	285294103	0.970678	0.942522	150	150	0.523208	1926428	288724320	284389634	278031775	0.984987	0.962966	149	149	0.524868	192	1916779	0.994991	1867360	0.974218	38000.8	0.92
29P	20	41.2	2142078	321311700	312770164	303714053	0.973417	0.945232	150	150	0.508329	2074224	310828264	305517938	297990182	0.982916	0.958697	149	149	0.509639	181	2059458	0.992881	2028052	0.98475	36591.6	0.92
30N	20	38	2406652	360997800	348850469	336649032	0.966351	0.932551	150	150	0.515411	2288144	342081392	335556933	326271669	0.980927	0.953784	149	149	0.5168	197	2258564	0.987072	2072567	0.917648	39364	0.92
30P	20	48.6	2279140	341871000	330446925	319373714	0.966584	0.934194	150	150	0.49267	2179554	326115730	319588939	310914447	0.979986	0.953387	149	149	0.494029	181	2145020	0.984155	2054793	0.957937	32952.5	0.92
31N	20	49.2	2317788	347668200	336342663	325979590	0.967424	0.937617	150	150	0.523279	2192476	328712350	323663255	316338469	0.98464	0.962357	149	149	0.526161	197	2180819	0.994683	2137138	0.97997	38939.6	0.92
31P	20	59.2	2058604	308790600	299895718	290707135	0.971194	0.941438	150	150	0.514417	1983216	297144154	291835186	284371659	0.982133	0.957016	149	149	0.516268	192	1971415	0.99405	1928121	0.978039	37244.9	0.92
32N	20	36.4	1990030	298504500	289803005	281359726	0.97085	0.942564	150	150	0.518474	1906406	285667962	281069111	274495798	0.983901	0.960891	149	149	0.520295	192	1891851	0.992365	1844715	0.975085	36439.7	0.92
32P	20	40.4	2772906	415935900	404832882	393253055	0.973306	0.945466	150	150	0.52357	2672572	400552172	394250233	385006184	0.984267	0.961189	149	149	0.52532	197	2659552	0.995128	2610745	0.981648	39760.4	0.92
33N	20	49.4	3084302	462645300	443314336	427149079	0.958216	0.923276	150	150	0.520156	2848074	426969426	419796708	409788277	0.983201	0.95976	149	149	0.524809	197	2825168	0.991957	2741291	0.970311	39443.2	0.92
33P	20	27.2	1797172	269575800	261911508	254461803	0.971569	0.943934	150	150	0.520667	1719958	257778892	253937720	248266079	0.985099	0.963097	149	149	0.522581	197	1710371	0.994426	1658234	0.969517	36563.9	0.92
34N	20	16.4	2033414	305012100	294680634	285273966	0.966128	0.935287	150	150	0.511255	1922040	287726324	283036001	276360284	0.983699	0.960497	149	149	0.513611	192	1896266	0.98659	1685215	0.888702	35261.1	0.92
34P	20	24.8	2878538	431780700	421492242	409956818	0.976172	0.949456	150	150	0.514127	2799788	419711020	413076637	403374983	0.984193	0.961078	149	149	0.515377	197	2790344	0.996627	2628516	0.942004	38915	0.92
35N	20	31.2	2537072	380560800	370522754	360487674	0.973623	0.947254	150	150	0.522075	2444830	365386492	359956986	352049055	0.98514	0.963498	149	149	0.523656	192	2428990	0.993521	2353403	0.968881	39374.8	0.92
35P	20	40.6	1990274	298541100	289241545	280174957	0.96885	0.93848	150	150	0.515529	1896984	284307116	279533428	272738229	0.983209	0.959308	149	149	0.517635	197	1889145	0.995868	1830558	0.968988	36877.4	0.92
37N	20	72.8	3141562	471234300	460612168	448825319	0.977459	0.952446	150	150	0.524128	3053056	457745982	451275445	441435740	0.985864	0.964368	149	149	0.525496	197	3041652	0.996265	2988761	0.982611	40460	0.92
37P	20	61.2	2605580	390837000	381947196	372214651	0.977254	0.952353	150	150	0.525024	2530712	379488780	374122826	366016178	0.98586	0.964498	149	149	0.52646	197	2524414	0.997511	2492160	0.987223	39122.4	0.92
38N	20	57.4	2348242	352236300	342891651	333480243	0.973471	0.946751	150	150	0.525794	2252882	337660816	332989632	325780961	0.986166	0.964817	149	149	0.527186	197	2239878	0.994228	2157685	0.963305	37213.6	0.92
38P	20	29.4	2188030	328204500	320000334	311680786	0.975003	0.949654	150	150	0.520702	2109416	316293156	311918741	305357050	0.98617	0.965424	149	149	0.52241	197	2100705	0.99587	2070577	0.985658	37816.2	0.92
39N	20	26.2	2074534	311180100	302043536	293005287	0.970639	0.941594	150	150	0.526172	1984326	297435706	292631893	285715414	0.983849	0.960596	149	149	0.527748	192	1973041	0.994313	1915758	0.970967	36930.4	0.92
39P	20	24.6	2445538	366830700	350857334	337069755	0.956456	0.91887	150	150	0.50418	2272086	340073360	332856759	323438685	0.978779	0.951085	149	149	0.50508	192	2239974	0.985867	2142432	0.956454	31809.7	0.88
40N	20	43.4	2159112	323866800	316377495	308492575	0.976875	0.952529	150	150	0.526676	2089688	313302068	309181625	302817518	0.986848	0.966535	149	149	0.528484	197	2082471	0.996546	2047797	0.98335	37495.1	0.92
40P	20	40.2	2507918	376187700	366449202	356517113	0.974113	0.947711	150	150	0.527806	2415392	361707646	356585584	348903312	0.985839	0.9646	149	149	0.5294	197	2400861	0.993984	2359101	0.982606	37745.7	0.92
41N	20	78.4	2325982	348897300	339693649	330288264	0.973621	0.946663	150	150	0.522663	2239962	335798180	330779666	323397713	0.985055	0.963072	149	149	0.524001	197	2228281	0.994785	2193631	0.98445	38822.5	0.92
41P	20	48.8	2427506	364125900	354331634	344066724	0.973102	0.944911	150	150	0.522904	2339470	350631290	345075486	336867759	0.984155	0.960746	149	149	0.524734	192	2327257	0.99478	2250936	0.967206	39481	0.92
42N	20	34.4	2819672	422950800	413737844	403025864	0.978217	0.952891	150	150	0.514813	2761368	413799416	407317875	397898835	0.984337	0.961574	149	149	0.515701	192	2747102	0.994834	2716526	0.98887	36950.5	0.92
42P	20	46.8	2439524	365928600	358383542	349790182	0.979381	0.955897	150	150	0.520129	2383492	357220506	352301859	344889754	0.986231	0.965481	149	149	0.521302	197	2369673	0.994202	2282742	0.963315	39436.2	0.92
44N	20	64	2577642	386646300	378939307	370026420	0.980067	0.957015	150	150	0.525037	2520730	377942560	372855411	365129387	0.98654	0.966098	149	149	0.526159	192	2510321	0.995871	2486316	0.990437	39359.1	0.92
44P	20	51.6	2227604	334140600	327028798	318676903	0.978716	0.953721	150	150	0.522218	2181736	327131614	322147985	314777055	0.984766	0.962234	149	149	0.523253	192	2174549	0.996706	2163488	0.994913	37226.4	0.88
45N	20	87.6	2833560	425034000	416389334	406604936	0.979661	0.956641	150	150	0.523192	2765806	414704786	409227166	400880358	0.986792	0.966664	149	149	0.524487	197	2756455	0.996619	2730752	0.990675	40041.5	0.92
45P	20	69.4	2542046	381306900	370492299	360092788	0.971638	0.944365	150	150	0.527909	2427368	363681542	358497591	350711505	0.985746	0.964337	149	149	0.529166	197	2391982	0.985422	2134318	0.89228	38975.7	0.92
46N	20	57	2263026	339453900	324207203	311340780	0.955085	0.917181	150	150	0.52355	2064246	308194192	302871039	295410198	0.982728	0.95852	149	149	0.525724	197	2047289	0.991785	1968962	0.961741	37015.5	0.92
46P	20	51.8	2406266	360939900	350984244	340685700	0.972417	0.943885	150	150	0.51496	2319898	347709734	341955110	333651131	0.98345	0.959568	149	149	0.516555	192	2303752	0.99304	2260594	0.981266	37780.6	0.88
47N	20	19.5	1883298	282494700	273462998	265070749	0.968029	0.938321	150	150	0.519155	1790966	268446186	264048653	257752474	0.983619	0.960164	149	149	0.521807	197	1781040	0.994458	1725731	0.968946	34944.4	0.88
47P	20	34.4	2119166	317874900	307526505	297382684	0.967445	0.935534	150	150	0.517223	2015502	301940648	296583781	289008144	0.982259	0.957169	149	149	0.51952	192	1996728	0.990685	1899119	0.951116	35640.8	0.84
48N	20	50.6	2411812	361771800	352593309	342647786	0.974629	0.947138	150	150	0.523957	2334328	349930654	344424048	336213175	0.984264	0.960799	149	149	0.525254	192	2318962	0.993417	2263954	0.976279	38390.1	0.92
48P	20	28	2049634	307445100	299346453	291150581	0.973658	0.947	150	150	0.518123	1974382	295975048	291546710	285111058	0.985038	0.963294	149	149	0.520147	192	1960590	0.993015	1933969	0.986422	35706.9	0.88
49N	20	76	2685488	402823200	395003577	386066461	0.980588	0.958402	150	150	0.527082	2625264	393604430	388602101	380907525	0.987291	0.967742	149	149	0.528164	197	2613746	0.995613	2587847	0.990091	39801	0.92
49P	20	44.2	2273110	340966500	333566455	325060227	0.978297	0.953349	150	150	0.516928	2224202	333423400	328344322	320856018	0.984767	0.962308	149	149	0.51794	192	2211890	0.994465	2188389	0.989375	36791.2	0.92
50N	20	58	2472132	370819800	367681754	361999321	0.991538	0.976214	150	150	0.533554	2469934	370251484	367153692	361516248	0.991633	0.976407	149	149	0.533597	192	2427720	0.982909	2416400	0.995337	37628	0.88
50P	20	71.2	2517706	377655900	374336777	368232133	0.991211	0.975047	150	150	0.534933	2515342	376989898	373715770	367664146	0.991315	0.975263	149	149	0.534971	192	2484413	0.987704	2470063	0.994224	38699.9	0.88
51N	20	73	2138578	320786700	317899439	312684099	0.990999	0.974741	150	150	0.531836	2136558	320370460	317518928	312344284	0.991099	0.974947	149	149	0.531884	192	2104054	0.984787	2096375	0.99635	36765	0.88
51P	20	59.8	2511476	376721400	372224382	364287189	0.988063	0.966994	150	150	0.513717	2508640	376055994	371611403	363734579	0.988181	0.967235	149	149	0.513789	192	2248612	0.896347	2222680	0.988468	37345.6	0.92
52N	20	94.4	2259154	338873100	335828593	330349023	0.991016	0.974846	150	150	0.530282	2256962	338300696	335297014	329864576	0.991121	0.975063	149	149	0.530341	192	2189054	0.969912	2175265	0.993701	38316.1	0.88
52P	20	67.4	2684254	402638100	399236624	393103987	0.991552	0.976321	150	150	0.535401	2682450	402190000	398825716	392737714	0.991635	0.976498	149	149	0.535442	192	2662421	0.992533	2653849	0.99678	38582.1	0.92
53N	20	89.8	2214846	332226900	329262445	323952252	0.991077	0.975093	150	150	0.530347	2212760	331702658	328779196	323515677	0.991186	0.975318	149	149	0.530408	197	2182694	0.986412	2169249	0.99384	37368.2	0.92
53P	20	54.6	2196572	329485800	326076650	320139808	0.989653	0.971635	150	150	0.525343	2194294	328807644	325444486	319560619	0.989772	0.971877	149	149	0.525388	192	2150914	0.980231	2124298	0.987626	37233.3	0.88
54N	20	59.8	2555588	383338200	380052584	374100865	0.991429	0.975903	150	150	0.534127	2553156	382802164	379560259	373658002	0.991531	0.976113	149	149	0.534178	192	2498644	0.978649	2486219	0.995027	37448.6	0.88
54P	20	29	1265244	189786600	188102942	185073334	0.991129	0.975165	150	150	0.532679	1264132	189464048	187801749	184796722	0.991226	0.975366	149	149	0.532726	192	1241039	0.981732	1232905	0.993446	29805.9	0.88
55N	20	60.6	2699912	404986800	401289150	394425344	0.99087	0.973921	150	150	0.534756	2697356	404420700	400769644	393960166	0.990972	0.974135	149	149	0.5348	192	2656126	0.984715	2588483	0.974533	36834.7	0.88
55P	20	28.4	1684282	252642300	249432024	244247837	0.987293	0.966773	150	150	0.510457	1682162	251984728	248820786	243688774	0.987444	0.967078	149	149	0.510496	196	1641829	0.976023	1623817	0.989029	25682.5	0.84
56N	20	77	1843266	276489900	274140005	269943623	0.991501	0.976324	150	150	0.533431	1841646	276068248	273749659	269588183	0.991601	0.976527	149	149	0.533473	192	1819969	0.98823	1811437	0.995312	35370.6	0.88
56P	20	50.2	2175438	326315700	322702915	316639924	0.988929	0.970348	150	150	0.52494	2173162	325577882	322014081	316007244	0.989054	0.970604	149	149	0.524976	192	2125877	0.978241	2106115	0.990704	33882.3	0.84
57N	20	72.6	2207928	331189200	328258822	322998211	0.991152	0.975268	150	150	0.531192	2206434	330802524	327903165	322679856	0.991235	0.975446	149	149	0.531238	192	2184164	0.989907	2173936	0.995317	37833.1	0.92
57P	20	65.6	2335260	350289000	346988253	341109681	0.990577	0.973795	150	150	0.531305	2333504	349843758	346579242	340743830	0.990669	0.973989	149	149	0.531346	192	2311264	0.990469	2299967	0.995112	37673	0.88
58N	20	34.6	2098442	314766300	311882839	306800638	0.990839	0.974693	150	150	0.524963	2096428	314324218	311476634	306435008	0.990941	0.974901	149	149	0.525027	197	2049951	0.97783	2035486	0.992944	36297.7	0.92
58P	20	32.2	1625774	243866100	240678295	235488669	0.986928	0.965647	150	150	0.512489	1623744	243123276	239977757	234837613	0.987062	0.96592	149	149	0.512503	192	1575413	0.970235	1545872	0.981249	32806.8	0.92
59N	20	56.8	2400502	360075300	357017459	351435154	0.991508	0.976005	150	150	0.533083	2399000	359759682	356730697	351183192	0.991581	0.976161	149	149	0.533124	197	2369724	0.987797	2363428	0.997343	37047.6	0.92
59P	20	36	2058708	308806200	305733466	300418216	0.99005	0.972837	150	150	0.530657	2056468	308288304	305257635	299989500	0.990169	0.973081	149	149	0.530713	192	2022171	0.983322	2009349	0.993659	36666.4	0.88
60N	20	91.8	2353320	352998000	350032079	344610478	0.991598	0.976239	150	150	0.534924	2351276	352493630	349564205	344183652	0.991689	0.976425	149	149	0.534965	192	2319140	0.986333	2308129	0.995252	37326.4	0.92
60P	20	55.6	2316218	347432700	344082065	338294324	0.990356	0.973697	150	150	0.526063	2314144	346860810	343551640	337810851	0.99046	0.973909	149	149	0.526109	192	2275024	0.983095	2260766	0.993733	37966.7	0.88
61N	20	116	2141006	321150900	318394804	313282673	0.991418	0.9755	150	150	0.534532	2139120	320746220	318023074	312949048	0.99151	0.975691	149	149	0.534571	197	2115592	0.989001	2106985	0.995932	36095.6	0.88
61P	20	62.2	2444410	366661500	362589472	355769349	0.988894	0.970294	150	150	0.521012	2441708	365723652	361708492	354953947	0.989021	0.970552	149	149	0.521056	192	2382449	0.975731	2349525	0.986181	36933.5	0.88
63N	20	57.2	2539640	380946000	377947388	372388077	0.992129	0.977535	150	150	0.535218	2537584	380564550	377599724	372079226	0.992209	0.977703	149	149	0.535259	197	2518701	0.992559	2513485	0.997929	35369.2	0.88
63P	20	51.2	2420110	363016500	359754817	353901426	0.991015	0.974891	150	150	0.530332	2417824	362472138	359253856	353450572	0.991121	0.975111	149	149	0.530388	192	2361717	0.976794	2349144	0.994676	37326.6	0.88
64N	20	72.6	2146224	321933600	318979476	313592135	0.990824	0.974089	150	150	0.533006	2144256	321430518	318512602	313167187	0.990922	0.974292	149	149	0.533055	192	2099809	0.979272	2089233	0.994963	36635.2	0.88
64P	20	51.2	1679374	251906100	248519030	243189426	0.986554	0.965397	150	150	0.508923	1676932	251193468	247861714	242593162	0.986736	0.965762	149	149	0.508977	196	1621111	0.966712	1607714	0.991736	20075.5	0.52
65N	20	110	2371532	355729800	352646257	347089854	0.991332	0.975712	150	150	0.532517	2369520	355185924	352140469	346627635	0.991426	0.975905	149	149	0.532555	192	2332852	0.984525	2317941	0.993608	38370.3	0.88
65P	20	91.4	2376198	356429700	353145542	347223198	0.990786	0.97417	150	150	0.530222	2373836	355930596	352687653	346813428	0.990889	0.974385	149	149	0.530272	197	2336402	0.984231	2323970	0.994679	38395.1	0.92
66N	20	76	2421088	363163200	359971173	354195196	0.99121	0.975306	150	150	0.533733	2418678	362692828	359541785	353813068	0.991312	0.975517	149	149	0.533785	197	2388362	0.987466	2378522	0.99588	37461.5	0.92
66P	20	52	2415228	362284200	358572760	352029400	0.989755	0.971694	150	150	0.527969	2412854	361582852	357922553	351439491	0.989877	0.971947	149	149	0.52802	192	2351162	0.974432	2332770	0.992177	37755.5	0.88
67N	20	70.8	2461134	369170100	365882433	359975769	0.991094	0.975095	150	150	0.532661	2458820	368686894	365439678	359579002	0.991192	0.975296	149	149	0.532712	192	2424527	0.986053	2416406	0.99665	38081.2	0.88
67P	20	76.6	2151282	322692300	319377865	313646449	0.989729	0.971968	150	150	0.526183	2148790	322131952	318863666	313184680	0.989854	0.972225	149	149	0.526249	192	2121838	0.987457	2107801	0.993385	38075.2	0.92
68N	20	36.4	2831754	424763100	421068727	414332595	0.991303	0.975444	150	150	0.531492	2829104	424165550	420519745	413838907	0.991405	0.975654	149	149	0.531538	192	2792598	0.987096	2780779	0.995768	37904.9	0.92
68P	20	70.4	2341220	351183000	347929123	342096148	0.990735	0.974125	150	150	0.528706	2339036	350526940	347315115	341531218	0.990837	0.974337	149	149	0.528778	192	2255388	0.964238	2212654	0.981052	37644.5	0.88
69N	20	78.8	2388726	358308900	354935588	348833643	0.990585	0.973556	150	150	0.528529	2386348	357834136	354502229	348447418	0.990689	0.973768	149	149	0.528583	197	2317885	0.971311	2304519	0.994234	37341.5	0.92
69P	20	84.6	2541288	381193200	377686275	371485341	0.9908	0.974533	150	150	0.53213	2538894	380670648	377206196	371052276	0.990899	0.974733	149	149	0.532177	192	2496197	0.983183	2483604	0.994955	38631.6	0.88
71N	20	46.2	1762552	264382800	262061993	257874070	0.991222	0.975381	150	150	0.530767	1761012	264028664	261735729	257579231	0.991316	0.975573	149	149	0.530827	192	1721268	0.977431	1705036	0.99057	34902.7	0.88
71P	20	39	1899926	284988900	281182510	275159988	0.986644	0.965511	150	150	0.507132	1897468	284232366	280480565	274520014	0.9868	0.96583	149	149	0.507159	196	1853401	0.976776	1834504	0.989804	22648.9	0.76
73N	20	68.4	1961834	294275100	291418624	286330564	0.990293	0.973003	150	150	0.526987	1959968	293872826	291050456	286000663	0.990396	0.973212	149	149	0.52703	197	1917457	0.97831	1907323	0.994715	35796.5	0.92
73P	20	76.4	2685624	402843600	398857796	391845497	0.990106	0.972699	150	150	0.525369	2682956	402214000	398277753	391320960	0.990214	0.972917	149	149	0.52542	192	2555749	0.952587	2539863	0.993784	38512.1	0.92
74N	20	34.8	2806028	420904200	417380247	411031976	0.991628	0.976545	150	150	0.531575	2803554	420351320	416871835	410574924	0.991722	0.976742	149	149	0.531628	197	2756763	0.98331	2742563	0.994849	38520.5	0.92
74P	20	38.2	3180534	477080100	472481223	464287606	0.99036	0.973186	150	150	0.525557	3177576	476311482	471770555	463643409	0.990466	0.973404	149	149	0.525599	192	3008649	0.946838	2992379	0.994592	38906	0.88
75N	20	44.6	2185690	327853500	325032096	319929722	0.991394	0.975831	150	150	0.533795	2183798	327460330	324672484	319607888	0.991486	0.97602	149	149	0.53384	192	2160020	0.989112	2152701	0.996612	35428.4	0.84
75P	20	27.4	2368302	355245300	351735757	345661234	0.990121	0.973021	150	150	0.530134	2365880	354666522	351200701	345175960	0.990228	0.973241	149	149	0.530181	192	2334436	0.986709	2322545	0.994906	37521.1	0.88
76N	20	52	2597466	389619900	386015039	379615526	0.990748	0.974323	150	150	0.528725	2595090	389046318	385485701	379135778	0.990848	0.974526	149	149	0.52877	192	2502681	0.964391	2491680	0.995604	37601	0.88
76P	20	47	2747364	412104600	408288027	401486853	0.990739	0.974235	150	150	0.532989	2744616	411505072	407738840	400995634	0.990848	0.974461	149	149	0.533044	192	2703647	0.985073	2687443	0.994007	38175.7	0.92
77N	20	102	2984214	447632100	443967939	437426121	0.991814	0.9772	150	150	0.529931	2981662	447086378	443468348	436977483	0.991908	0.977389	149	149	0.529984	197	2937556	0.985208	2923201	0.995113	39075.5	0.92
77P	20	39.2	2396650	359497500	356013901	349933211	0.99031	0.973395	150	150	0.527687	2394846	358974838	355529812	349494050	0.990403	0.973589	149	149	0.527724	192	2369201	0.989292	2353989	0.993579	38003.5	0.88
78N	20	55.2	2823172	423475800	419743432	412960046	0.991186	0.975168	150	150	0.534609	2820478	422946832	419260601	412530405	0.991284	0.975372	149	149	0.534663	192	2768749	0.981659	2758037	0.996131	36300.4	0.92
78P	20	37	1626956	244043400	239839318	233570593	0.982773	0.957086	150	150	0.492817	1624404	242973970	238833448	232635374	0.982959	0.95745	149	149	0.492755	196	1581190	0.973397	1542860	0.975759	20145.5	0.76
79N	20	41.4	2736726	410508900	406857159	400162003	0.991104	0.974795	150	150	0.533536	2734186	410048632	406440605	399794976	0.991201	0.974994	149	149	0.533582	197	2715506	0.993168	2709103	0.997642	35541.7	0.88
79P	20	27.6	1937772	290665800	287087674	281198219	0.98769	0.967428	150	150	0.519823	1935438	289946966	286418280	280585392	0.98783	0.967713	149	149	0.519865	192	1891182	0.977134	1864933	0.98612	33198.2	0.84
A101	20	49	2867658	430148700	418525798	406802029	0.972979	0.945724	150	150	0.522765	2756892	413320134	407080881	397996220	0.984905	0.962925	149	149	0.525115	197	2743097	0.994996	2703741	0.985653	39575.6	0.92
A102	20	80.4	2186826	328023900	318578845	309228187	0.971206	0.9427	150	150	0.518737	2094908	313986602	309011931	301704961	0.984156	0.960885	149	149	0.520369	197	2080697	0.993216	2017169	0.969468	38977.6	0.92
A44	20	18.6	2710488	406573200	390571019	376730508	0.960641	0.926599	150	150	0.514668	2522812	377520218	371319813	361878510	0.983576	0.958567	149	149	0.520829	197	2425353	0.961369	2400673	0.989824	38252.5	0.92
A45	20	19.5	2235138	335270700	323140095	311998458	0.963818	0.930587	150	150	0.517074	2104280	315245926	310063366	302080556	0.98356	0.958238	149	149	0.522558	197	2066605	0.982096	2039622	0.986943	36821.4	0.88
A46	20	11.2	2141250	321187500	309850759	299037045	0.964704	0.931036	150	150	0.508148	2030462	304167598	298432564	290207081	0.981145	0.954103	149	149	0.512614	192	1999291	0.984648	1978613	0.989657	35684.2	0.88
A47	20	19.1	2021002	303150300	292899990	283020847	0.966187	0.933599	150	150	0.516153	1915308	287035824	282090493	274668307	0.982771	0.956913	149	149	0.521153	197	1885893	0.984642	1871854	0.992556	37276.3	0.92
A48	20	15.7	1801208	270181200	262343861	254579342	0.970992	0.942254	150	150	0.520038	1724798	258483998	254545360	248489132	0.984763	0.961333	149	149	0.523935	197	1701970	0.986765	1687953	0.991764	37098.5	0.92
A49	20	9.38	1597422	239613300	224494982	213769623	0.936905	0.892144	150	150	0.506343	1405122	209577914	205533884	199774174	0.980704	0.953222	149	149	0.518786	197	1359132	0.96727	1319697	0.970985	32923.2	0.88
A50	20	12.2	2832072	424810800	407893263	393299994	0.960176	0.925824	150	150	0.515818	2632642	394472952	387894892	378071262	0.983324	0.958421	149	149	0.52232	197	2593676	0.985199	2559375	0.986775	39257.5	0.96
A54	20	36.4	2028968	304345200	292950689	283118842	0.962561	0.930256	150	150	0.514331	1897352	284170124	279708759	272953596	0.9843	0.960529	149	149	0.521127	197	1850156	0.975125	1835863	0.992275	37562.1	0.92
A57	20	24.2	2146898	322034700	312556797	303144616	0.970569	0.941341	150	150	0.51933	2052542	307576380	302895877	295595112	0.984783	0.961046	149	149	0.523089	197	2015194	0.981804	2003104	0.994001	37436.3	0.92
A58	20	20.4	2414684	362202600	346478565	332587818	0.956588	0.918237	150	150	0.493545	2246660	336137436	328986518	319112375	0.978726	0.949351	149	149	0.499971	192	2177693	0.969302	2139341	0.982389	36342	0.92
A59	20	36	2247142	337071300	326590675	316894981	0.968907	0.940142	150	150	0.516528	2136606	320131104	315331044	308162909	0.985006	0.962615	149	149	0.521127	197	2102499	0.984037	2089849	0.993983	38334.2	0.92
A61	20	15.7	2001030	300154500	291987362	283157638	0.97279	0.943373	150	150	0.517928	1931072	289437412	284696378	277456488	0.98362	0.958606	149	149	0.520935	197	1917862	0.993159	1905902	0.993764	36847.7	0.88
A62	20	15.6	2195136	329270400	319854883	310412717	0.971405	0.942729	150	150	0.522105	2102728	315156988	310453570	303148224	0.985076	0.961896	149	149	0.525758	197	2075311	0.986961	2061879	0.993528	36953	0.92
A64	20	21.2	2642300	396345000	393430263	387082742	0.992646	0.976631	150	150	0.519056	2641562	395804396	392915952	386605058	0.992702	0.976758	149	149	0.519063	197	2620977	0.992207	2578605	0.983834	40015.4	0.96
A65	20	57	2329404	349410600	347036094	341494850	0.993204	0.977345	150	150	0.52039	2328866	348659822	346307742	340801338	0.993254	0.977461	149	149	0.5204	197	2305053	0.989775	2168986	0.94097	37493.2	0.96
A66	20	41.4	1630434	244565100	242887889	239368477	0.993142	0.978752	150	150	0.519929	1630078	244345996	242680626	239177249	0.993184	0.978847	149	149	0.519939	197	1623712	0.996095	1593407	0.981336	35487.5	0.92
A67	20	79.2	2218566	332784900	330599079	325682025	0.993432	0.978656	150	150	0.524718	2218056	332495638	330331193	325444449	0.99349	0.978793	149	149	0.524735	197	2205909	0.994524	2189887	0.992737	37765.5	0.96
A68	20	89.6	2641352	396202800	393065675	386343486	0.992082	0.975115	150	150	0.515435	2640542	395622398	392514963	385830455	0.992145	0.975249	149	149	0.51544	192	2451749	0.928502	2360594	0.96282	39211.6	0.96
A72	20	22.6	2100682	315102300	313154620	308788979	0.993819	0.979964	150	150	0.529725	2100254	314943276	313004713	308649904	0.993845	0.980017	149	149	0.529741	197	2091119	0.995651	2081091	0.995204	37744	0.96
A73	20	23	2082762	312414300	310866519	307213591	0.995046	0.983353	150	150	0.524968	2082552	312309470	310767001	307120671	0.995061	0.983386	149	149	0.524975	197	2078069	0.997847	2071735	0.996952	37357.9	0.92
A75	20	23.6	1576566	236484900	232992583	227081939	0.985232	0.960239	150	150	0.471286	1575482	235398218	231944641	226083670	0.985329	0.960431	149	149	0.471035	181	1544748	0.980492	1481051	0.958765	21143.4	0.92
A85	20	38.8	1980306	297045900	294990477	290548719	0.99308	0.978127	150	150	0.520501	1979796	296759476	294725016	290314520	0.993144	0.978282	149	149	0.520521	197	1969465	0.994782	1957607	0.993979	36500.1	0.92
A86	20	57.2	2502074	375311100	372814628	367336176	0.993348	0.978751	150	150	0.523129	2501504	375057548	372577345	367120847	0.993387	0.978839	149	149	0.523146	197	2492006	0.996203	2478110	0.994424	40135.1	0.96
A88	20	31.8	2545770	381865500	371467931	360773097	0.972772	0.944765	150	150	0.519758	2451572	367560434	361706841	353181711	0.984074	0.960881	149	149	0.521389	197	2438581	0.994701	2390377	0.980233	39000.5	0.92
A89	20	51.4	2370760	355614000	346108233	336544943	0.973269	0.946377	150	150	0.522397	2278554	341509560	336580670	329159387	0.985567	0.963837	149	149	0.52406	197	2263552	0.993416	2196904	0.970556	39933.8	0.92
A94	20	7.64	569240	85386000	81804564	78827241	0.958056	0.923187	150	150	0.51369	527640	79036340	77626230	75664408	0.982159	0.957337	149	149	0.517201	197	517679	0.981122	491125	0.948706	13465.6	0.92
A95	20	36	2613380	392007000	380216615	369175554	0.969923	0.941758	150	150	0.52528	2485264	372584698	367152997	359121421	0.985422	0.963865	149	149	0.527223	197	2473140	0.995122	2413837	0.976021	39974.2	0.92
A96	20	43	2738376	410756400	401897391	391890852	0.978432	0.954071	150	150	0.522128	2667224	399950546	394407565	385973464	0.986141	0.965053	149	149	0.523403	197	2657659	0.996414	2633045	0.990738	40518.5	0.92
A97	20	53.6	2568016	385202400	376844653	367028799	0.978303	0.952821	150	150	0.510483	2510722	376427100	370732518	362170002	0.984872	0.962125	149	149	0.511553	197	2501525	0.996337	2479676	0.991266	39046.2	0.92
B101	20	41	2617614	392642100	383192564	372872421	0.975933	0.94965	150	150	0.521198	2536490	380201758	374556006	366063082	0.985151	0.962813	149	149	0.522234	197	2523896	0.995035	2448510	0.970131	39314.1	0.92
B102	20	64.8	2910780	436617000	419242056	404227823	0.960206	0.925818	150	150	0.516206	2709838	406173122	399071613	389221489	0.982516	0.958265	149	149	0.520591	197	2684246	0.990556	2598614	0.968098	39566.9	0.92
B44	20	29	1852648	277897200	271066358	263518498	0.97542	0.948259	150	150	0.521705	1793238	268883476	264917267	258674197	0.985249	0.962031	149	149	0.524316	197	1784863	0.99533	1779219	0.996838	35615.3	0.92
B45	20	11.8	2290436	343565400	319747092	302762010	0.930673	0.881235	150	150	0.49762	1967822	293245860	286504781	277504848	0.977012	0.946321	149	149	0.512878	197	1858698	0.944546	1800100	0.968474	35706	0.92
B46	20	13.5	1579934	236990100	227942735	219464713	0.961824	0.92605	150	150	0.50339	1488622	222839386	218457517	212162363	0.980336	0.952086	149	149	0.508486	192	1444634	0.970451	1428371	0.988742	33204	0.88
B47	20	30.8	2146626	321993900	308119389	296337766	0.956911	0.920321	150	150	0.507268	1986298	297061540	291639272	283676355	0.981747	0.954941	149	149	0.515044	197	1899651	0.956378	1880792	0.990072	37277	0.92
B48	20	12.5	2143312	321496800	311132281	300626339	0.967762	0.935083	150	150	0.518456	2042846	306002588	300650156	292506294	0.982509	0.955895	149	149	0.522901	197	1999609	0.978835	1984980	0.992684	37908.4	0.88
B49	20	9.74	1994658	299198700	287902916	277355223	0.962247	0.926993	150	150	0.510169	1875316	280940944	275748088	268034354	0.981516	0.954059	149	149	0.516121	197	1839341	0.980817	1819341	0.989127	36015.4	0.92
B50	20	15.2	2129776	319466400	308688435	298404256	0.966263	0.934071	150	150	0.511869	2022934	303152978	297802401	290034121	0.98235	0.956725	149	149	0.516438	197	1996368	0.986868	1977302	0.99045	37917.7	0.96
B54	20	21.4	1944528	291679200	284610056	276489489	0.975764	0.947923	150	150	0.518179	1887064	282971146	278645590	271790271	0.984714	0.960488	149	149	0.520477	197	1879613	0.996052	1873039	0.996502	35990.9	0.88
B57	20	24.4	2413440	362016000	346951886	334551595	0.958388	0.924135	150	150	0.510206	2239868	335034360	329555238	321509228	0.983646	0.959631	149	149	0.517476	197	2191391	0.978357	2165183	0.98804	37734.5	0.92
B58	20	18.6	2421554	363233100	350503003	338337502	0.964953	0.931461	150	150	0.509584	2295252	343865704	337576388	328352615	0.98171	0.954886	149	149	0.514036	197	2264864	0.98676	2231396	0.985223	38317	0.96
B59	20	20	2374562	356184300	339855303	326627386	0.954156	0.917018	150	150	0.509966	2176652	325201438	319493641	311214396	0.982448	0.95699	149	149	0.519716	197	2072172	0.952	2049433	0.989026	38415	0.92
B61	20	11.6	1391126	208668900	196112018	186991033	0.939824	0.896114	150	150	0.509501	1226180	183625120	180013266	174936812	0.98033	0.952685	149	149	0.519895	197	1203770	0.981724	1174136	0.975382	30340.4	0.88
B62	20	15.6	1515508	227326200	220384522	213524537	0.969464	0.939287	150	150	0.512425	1450122	217209270	213530049	208179225	0.983061	0.958427	149	149	0.516469	197	1431643	0.987257	1417667	0.990238	33766.3	0.92
B64	20	26	4411670	661750500	656793801	646598512	0.99251	0.977103	150	150	0.51905	4410548	660866082	655943631	645794230	0.992552	0.977194	149	149	0.519054	197	3984596	0.903424	3911463	0.981646	41563.8	0.96
B65	20	26.2	2055732	308359800	305799453	300359842	0.991697	0.974056	150	150	0.508268	2055128	307863330	305318591	299900274	0.991734	0.974134	149	149	0.508276	197	1988489	0.967574	1921723	0.966424	34485.9	0.92
B66	20	18.9	2538574	380786100	378050746	372138470	0.992817	0.97729	150	150	0.515444	2537894	380396340	377684550	371804077	0.992871	0.977412	149	149	0.515463	197	2517627	0.992014	2461384	0.97766	38097.5	0.92
B67	20	71.2	2512116	376817400	374708170	369841487	0.994403	0.981487	150	150	0.53338	2511612	376526296	374434063	369590797	0.994443	0.98158	149	149	0.5334	197	2494813	0.993311	2466051	0.988471	38898.6	0.92
B68	20	71.4	2162538	324380700	322129827	317298570	0.993061	0.978167	150	150	0.523777	2161986	323886994	321657775	316856724	0.993117	0.978294	149	149	0.523787	192	2138357	0.989071	2109704	0.9866	38725	0.96
B72	20	29.8	2252314	337847100	335699241	330950703	0.993643	0.979587	150	150	0.52825	2251780	337621424	335488890	330759658	0.993684	0.979676	149	149	0.528272	197	2241168	0.995287	2230202	0.995107	38228.6	0.96
B73	20	27.2	2150468	322570200	320444945	315676498	0.993411	0.978629	150	150	0.524317	2150026	322337552	320227683	315481482	0.993454	0.97873	149	149	0.524332	197	2142512	0.996505	2129295	0.993831	37692.7	0.92
B75	20	52	2126622	318993300	316830759	311986817	0.993221	0.978036	150	150	0.524928	2126124	318643628	316500155	311682855	0.993273	0.978155	149	149	0.524943	197	2110028	0.992429	2086617	0.988905	38582.8	0.92
B85	20	29.2	2233192	334978800	332323337	326696985	0.992073	0.975277	150	150	0.512837	2232560	334713018	332077851	326479023	0.992127	0.9754	149	149	0.51286	197	2218859	0.993863	2200704	0.991818	35762.1	0.92
B86	20	20.8	2496560	374484000	371713705	365799103	0.992602	0.976808	150	150	0.521434	2495860	374008298	371264206	365384145	0.992663	0.976941	149	149	0.521448	197	2477597	0.992683	2446533	0.987462	40524	0.96
B88	20	36.4	2390024	358503600	349254177	339506459	0.9742	0.94701	150	150	0.526724	2304654	345332972	340143903	332352495	0.984974	0.962412	149	149	0.528202	197	2221244	0.963808	2133686	0.960582	39042.3	0.92
B89	20	41.4	2390142	358521300	346867770	335479904	0.967496	0.935732	150	150	0.513862	2275460	340923766	334770219	326149537	0.98195	0.956664	149	149	0.516011	181	2262831	0.99445	2188993	0.967369	39194.5	0.92
B94	20	45	2445862	366879300	356433646	345461459	0.971528	0.941622	150	150	0.516751	2351866	352232934	346224712	337511930	0.982942	0.958207	149	149	0.518337	197	2332598	0.991807	2108826	0.904067	38921.1	0.92
B95	20	49.4	3015144	452271600	441441900	429505181	0.976055	0.949662	150	150	0.52312	2925080	438629038	431989567	422064815	0.984863	0.962236	149	149	0.524483	197	2918097	0.997613	2898060	0.993134	40296.3	0.92
B96	20	44	1925072	288760800	281497516	274022145	0.974847	0.948959	150	150	0.51742	1859150	278770242	274698277	268705902	0.985393	0.963897	149	149	0.518973	197	1853718	0.997078	1834513	0.98964	36632.5	0.92
B97	20	31.8	2399500	359925000	350800965	341298902	0.97465	0.94825	150	150	0.516888	2317914	347521308	342326907	334649450	0.985053	0.962961	149	149	0.518431	197	2309121	0.996207	2277697	0.986391	39696.9	0.92
control	20	86.5	2816726	422485242	418265922	410486056	0.990013	0.971599	149	149	0.517463	2813102	421362274	417502374	409799664	0.990839	0.972559	149	149	0.518005	197	2463388	0.875684	2445704	0.992821	42710.2	0.88
S1bp	20	88.2	2148424	322263600	318283550	311614374	0.98765	0.966955	150	150	0.521572	2146722	321036056	317539832	310937223	0.98911	0.968543	149	149	0.522426	192	2100969	0.978687	2074427	0.987367	40258.6	0.88
S2bp	20	79.6	2148424	322263600	318283550	311614374	0.98765	0.966955	150	150	0.521534	2146284	320867841	317340011	310753201	0.989005	0.968477	149	149	0.522551	192	2100485	0.978661	2073945	0.987365	40271.7	0.88
S3bp	20	83.6	2378120	356616046	353941479	348368989	0.9925	0.976874	149	149	0.533933	2375180	355721728	353329783	347832467	0.993276	0.977822	149	149	0.534643	197	2367811	0.996897	2361778	0.997452	44431.1	0.88
